# 1 **The essential genome of the crenarchaeal model *Sulfolobus islandicus***

2

3 Changyi Zhang<sup>1, 2#</sup>, Alex P. R. Phillips<sup>1, 2#</sup>, Rebecca L. Wipfler<sup>1</sup>, Gary J. Olsen<sup>1, 2</sup> and Rachel J.  
4 Whitaker<sup>1, 2\*</sup>

5 <sup>1</sup> Carl R. Woese Institute for Genomic Biology, University of Illinois at Urbana-Champaign,  
6 Urbana, Illinois, USA

7 <sup>2</sup> Department of Microbiology, University of Illinois at Urbana-Champaign, Urbana, Illinois,  
8 USA

9 # C.Z. and A.P.R.P contributed equally to this work

10 \*Correspondence: Rachel J. Whitaker. E-mail: [rwhitaker@life.illinois.edu](mailto:rwhitaker@life.illinois.edu)

11

## 12 **Abstract**

13 *Sulfolobus islandicus* is a model experimental system in the TACK superphylum of the Archaea,  
14 a key lineage in the evolutionary history of cell biology. Here we report a genome-wide  
15 identification of the repertoire of genes essential to *S. islandicus* growth in culture. We confirm  
16 previous targeted gene knockouts, uncover the non-essentiality of functions assumed to be  
17 essential to the *Sulfolobus* cell, including the proteinaceous S-layer, and highlight key essential  
18 genes whose functions are yet to be determined. Phyletic distributions illustrate the potential  
19 transitions that have occurred during the evolution of this contemporary archaeal cell and  
20 highlight the sets of genes that may have been associated with each transition. We use this  
21 comparative context as a lens to focus future research on archaea-specific uncharacterized  
22 essential genes for which future functional data would provide valuable insights into the  
23 evolutionary history of the contemporary cell.

24

25 41 years ago, Woese and Fox identified the Archaea as a novel microbial lineage distinct from  
26 Bacteria<sup>1</sup>. The same year, Woese and Fox proposed a model of cellular evolution in which early  
27 cellular life diverged in two directions, one to the Bacteria and the other to LEACA, the Last  
28 Ekaryotic and Archaean Common Ancestor, which was subsequently split to form the Archaea  
29 and Eukaryota domains<sup>2,3,4</sup>. Increases in genome and metagenome sequence data continue to  
30 refine this picture, providing reinforcement for many of its key aspects, improving phylogenetic  
31 sampling, and providing additional details<sup>5-12</sup>. The tree of life itself has evolved with the  
32 addition of new lineages whose gene content and phylogenetic reconstruction suggests that the  
33 Thaumarcheota, Aigarchaeota, Crenarchaeota, and Korarchaeota (TACK) lineage of Archaea  
34 may hold the esteemed position of sharing a more recent common ancestor with the Eukaryota  
35 domain than other archaeal groups<sup>5,6,13-16</sup>.

36

37 Today the tree of life provides a framework for studying the evolution of cellular complexity.  
38 Genomics and metagenomics provide data on the distribution of genes across this tree and in  
39 doing so provide an understanding of the origins and evolutionary dynamics of gene sequences.  
40 However, phyletic distributions fall short of establishing the functional evolutionary history of

41 the cell since gene presence does not link directly to function. Truly mapping evolution of  
42 today's complex contemporary cells involves a comparative approach in which functional  
43 cellular systems and the interactions of their constituent components are examined at a  
44 molecular level in organisms representing key evolutionary lineages across the tree of life.

45

46 As a step in that direction, we take a genome-wide functional approach to define 441 genes  
47 essential to the growth of *S. islandicus*. *Sulfolobus*, a thermoacidophilic genus from geothermal  
48 hot springs, is one of the few organisms within the TACK archaea that can be cultured and is  
49 genetically tractable, and it is the most developed model for studying the biology of cells in this  
50 lineage. We highlight surprises revealed by subsequently examining the function of essential  
51 and non-essential genes in this model organism, including the non-essentiality of the S-layer  
52 protein found to be present in most cells in the archaeal domain<sup>17</sup>. As a step toward comparative  
53 functional cell biology, we illustrate the stages of evolution of the essential gene repertoire of  
54 the contemporary functional archaeal cell and provide a lens through which to focus attention  
55 on uncharacterized genes that will enable further characterization of transitions in cellular  
56 evolution.

57

## 58 **Results and Discussion**

### 59 *Identifying essential genes in the genome of S. islandicus through Tn-Seq*

60 We established three independent genome-wide disruption libraries in an agmatine-auxotrophic  
61 strain of *S. islandicus* M.16.4 by using a modified *in vitro* transposon mutagenesis system  
62 derived from Tn5 (Epicentre, USA). The transposable element was comprised of a nutritional  
63 marker cassette, *SsoargD* (arginine decarboxylase derived from *Sulfolobus solfataricus* P2),  
64 flanked by two 19-bp inverted repeats (Fig. 1a). After electroporation-mediated transformation  
65 of ArgD<sup>-</sup> cells with the EZ-Tn5 transposome, cells were allowed 10 days of growth on rich  
66 media. While valuable information about metabolic and regulatory genes could have been  
67 gained by comparing results from different media conditions, we restricted this study to one  
68 rich medium to focus on central cellular rather than metabolic functions. Insertion locations  
69 were determined via genome tagging and fragmentation (“tagmentation”) on colony pools,  
70 followed by amplification and sequencing of the junction sites, which were then mapped onto  
71 the genome. In all, 89,758 unique insertion events with at least 3 reads each were identified  
72 across all three libraries, corresponding to an average of one insertion every 29 base pairs and  
73 an average expected 29 insertions in each annotated protein-coding gene (see Methods;  
74 Supplementary Table 1 contains colony, insertion, and read counts for each library while all  
75 insertion locations can be found in Supplementary Dataset 1).

76

77 Essential genes were predicted to be significantly underrepresented in the insertion locations  
78 extracted from the transposon mutagenesis and sequencing data (Tn-seq). It is important to note  
79 that this may make them indistinguishable from genes that are not strictly essential for growth,  
80 but instead cause a severe growth defect, and thus our definition of “essential” extends to these

81 genes too. To determine the statistical separation between essential and non-essential genes, we  
82 used a combination of two programs: ESSENTIALS<sup>18</sup> and Tn-Seq Explorer<sup>19</sup>. Both methods  
83 report essential gene candidates by separating essential and non-essential genes into a bimodal  
84 distribution of scores. ESSENTIALS does so by calculating a log ratio of observed and  
85 expected reads in each gene ( $\log_2FC$ ), while Tn-Seq Explorer uses a sliding window approach  
86 to examine the absolute number of insertions in and around genes and calculates an Essentiality  
87 Index (EI) for each. The former tends to underestimate the number of essential genes, while the  
88 latter tends to overestimate<sup>19</sup>. 445 genes lie within the suggested range for both methods ( $\log_2FC$   
89  $\leq -5.1$  and  $EI < 4$ ), leaving 178 genes within only one range, or “unassigned” as essential or non-  
90 essential. The remaining 2,105 protein-coding genes are likely non-essential for growth under  
91 these conditions (Fig. 1b and Supplementary Dataset 2). Three genes identified as essential  
92 through automated methods were additionally removed because misplaced multiply mapped  
93 reads falsely reduced read count (*MI64\_0862*, *MI64\_1012*, and *MI64\_1867*; see  
94 Supplementary Table 2). Assignments of all genes to categories with their scores for each  
95 method are listed in Supplementary Dataset 2.

96

#### 97 *Genetic confirmation of essential gene criteria*

98 To support our informatic essentiality/non-essentiality criteria, 129 genes were compared with  
99 gene knockout studies performed in our model *S. islandicus* M.16.4 and another two genetically  
100 tractable *S. islandicus* strains: RYE15A and LAL 14/1 (Supplementary Table 3). We were  
101 unable to acquire knockouts for 42 of 45 predicted essential genes in this set. Two exceptions,  
102 *topR2* (*MI64\_1245*) and *apt* (*MI64\_0158*), were identified to have significant growth defects  
103 on plates once they were knocked out (Supplementary Fig. 1c, 2a and <sup>20</sup>), likely resulting in  
104 their under-representation in our transposon library. The third, *cdvB3* (*MI64\_1510*), a paralog  
105 of *cdvB*, may be incorrectly called essential in our Tn-seq analysis. We can readily obtain *cdvB3*  
106 disruption mutants (Supplementary Fig. 3b) and the growth of a *cdvB3* mutant strain is  
107 indistinguishable from the wild-type strain (data not shown), thus this gene was removed from  
108 the essential gene list. An explanation of why this gene is mischaracterized would require  
109 further investigation, but it is possible that, because the score distributions for essential and  
110 non-essential genes overlap, this gene was simply not hit enough times to achieve significance.  
111 This could be true for a small number of other genes as well and is a fundamental limitation of  
112 Tn-seq.

113

114 To further investigate our automated assignments, we screened eight “unassigned” genes in *S.*  
115 *islandicus* M.16.4 that were called essential by one method or the other but not both. We were  
116 unable to obtain mutants for six of them. Of these, five genes, i.e., *lig* (*MI64\_1953*), *priL*  
117 (*MI64\_1568*), *priX* (*MI64\_1652*), *rnhII* (*MI64\_0197*), and *tfs2* (*MI64\_1524*) were called  
118 essential via EI but not  $\log_2FC$ , while *thrSI* (*MI64\_0290*) was called essential based on  $\log_2FC$   
119 but not EI. In contrast, knockouts of the two “unassigned” genes called essential by EI but not  
120  $\log_2FC$ , *udg4* (*MI64\_0085*), encoding uracil-DNA glycosylase family 4, and *rpo8*

121 (*M164\_1872*), encoding a subunit of RNA polymerase, were obtained after an extended 14 days  
122 incubation of transformation plates, again consistent with a severe growth defect  
123 (Supplementary Fig. 2b, 2c, and 3b). This suggests the presence of false negatives and a  
124 stronger bias to underestimate than overestimate the true number of essential genes. Because  
125 not all genes in the unassigned categories were genetically tested, we conservatively excluded  
126 all unassigned genes from the essential gene list. By contrast, knockouts for all 76 non-essential  
127 genes tested were successfully obtained and verified by PCR analysis (Supplementary Table 3  
128 and Supplementary Fig. 3). These include *hjm/hel308a* (*M164\_0269*), *cdvB1* (*M164\_1700*),  
129 *topR1* (*M164\_1732*), and three DExD/H-box family helicase genes (*M164\_0809*, *M164\_2103*,  
130 and *M164\_2020*), the homologs of which were previously thought to be essential in a related  
131 strain *S. islandicus* Rey15A<sup>21-24</sup> (Supplementary Table 3 and Supplementary Fig. 3b). Taken  
132 together, these experimental results supported the overall validity of our computational  
133 approaches for conservatively classifying putative gene essentiality.

134

### 135 *Essential gene repertoire*

136 The functional repertoire of the predicted essential, unassigned, and non-essential genes of *S.*  
137 *islandicus* is shown in Fig. 2. With the above adjustments, the size of this essential genome  
138 (441 genes) is close in size to that observed for other bacteria and archaea<sup>25</sup>. For example, ~526  
139 genes are required for growth in *Methanococcus maripaludis* S2<sup>26</sup> and 473 genes within the  
140 engineered *Mycoplasma mycoides* JCVI Syn3.0 minimal bacterial cell<sup>27</sup>. The proportion of  
141 different functional categories represented in this set (as defined by archaeal clusters of  
142 orthologous genes<sup>12</sup> (arCOG)) are also similar to that observed in other studies<sup>26,27</sup> (Fig. 2),  
143 with the largest fraction of genes (178, 40%) representing information processing (translation,  
144 transcription, and DNA replication/recombination/repair) and 76 (~17%) either classified as  
145 “Function unknown” or “General functional prediction only”. The latter two categories are  
146 hereby collectively referred to as “poorly characterized”. Descriptions of the specific essential  
147 components found in central information processing and the cell cycle, as well as central carbon  
148 metabolism, are detailed in Supplementary Information. We highlight only a few interesting  
149 and novel observations below.

150

### 151 *S-layer is non-essential in S. islandicus*

152 Our essential gene predictions include several surprising findings. First, SlaA (*M164\_1763*)  
153 and SlaB (*M164\_1762*), the two known components of the surface layer (S-layer) on the outside  
154 of *Sulfolobus* cells<sup>28</sup> were shown to be non-essential. SlaA is the dominant component of the S-  
155 layer that forms a quasi-crystalline matrix the outside of the cell membrane<sup>29</sup>. Current models  
156 suggest a “stalk-and-cap” structure in which the C-terminal-transmembrane-helix-domain-  
157 containing SlaB projects from the cell membrane and anchors SlaA to the cell membrane<sup>17,30,31</sup>.  
158 The cellular function of the *Sulfolobus* S-layer is unknown, but is believed to provide resistance  
159 to osmotic stress and contribute to cell morphology<sup>28</sup>. S-layer deficient mutants have never been  
160 successfully cultivated before in any archaeal species, therefore it was assumed to be essential.



161

162 To confirm the non-essentiality of the S-layer genes, we constructed in-frame deletion mutants  
163 of *slaA*, *slaB*, and *slaAB* via a MID (marker insertion and unmarked target gene deletion)  
164 recombination strategy<sup>32</sup>. PCR amplification with two primer sets, which bind the flanking and  
165 internal region of S-layer genes, respectively (Fig. 3a), confirmed the successful deletion of  
166 *slaA*, *slaB*, and *slaAB* from the chromosome of the genetic host RJW004 (wild type) (Fig. 3b).  
167 We next tested for absence of the S-layer proteins in growing cells. Isolation of a white  
168 precipitant, described as the S-layer previously<sup>33</sup>, was possible only in the wild type and to a  
169 much lesser extent in the  $\Delta$ *slaB* mutant strain (Supplementary Fig. 4a and 4b). Transmission  
170 electron microscopy (TEM) analysis confirmed this extracted protein precipitate from both wild  
171 type and  $\Delta$ *slaB* formed crystalline lattice structures (Supplementary Fig. 4c). Finally, we tested  
172 the mutant phenotypes by comparing their growth profiles with wild type in a standard  
173 laboratory condition (pH 3.3, 76 °C). As shown in Fig. 3c, cells lacking the S-layer protein  
174 lattice SlaA (including *slaA* and *slaAB* mutants) are viable but have a measurable growth defect.  
175 This confirms the non-essentiality of the S-layer lattice in *S. islandicus*. The deletion of *slaB*  
176 alone had no significant impact on the growth rate in comparison with that of wild type (Fig.  
177 3c). For a complete knockout of all potential S-layer components, we successfully created a  
178 viable triple knockout of *slaA*, *slaB*, and a paralog of SlaB encoded by *M164\_1049* (42%  
179 coverage, 53% amino acid identity via BLAST), demonstrating non-essentiality of all S-layer  
180 components together in *S. islandicus* (Supplementary Fig. 5).

181

182 We performed thin-section TEM analyses of the RJW004 (wild type) and S-layer gene  
183 knockout strains. The thin section micrographs of wild-type cells clearly revealed that the S-  
184 layer was separated from the cytoplasmic membrane by a quasi-periplasmic space (Fig. 4a and  
185 4e), in agreement with previous studies in *Sulfolobus acidocaldarius*<sup>34</sup> and *Sulfolobus*  
186 *shibatae*<sup>29</sup>. The S-layer in the wild type was observed as a distinct dark band on the outermost  
187 edge of the cell, and the quasi-periplasmic space was seen as a light grey band between the  
188 outermost band and the cell membrane (Fig. 4a and 4e). However, the dark, outermost layer  
189 surrounding the cell was not observed in the  $\Delta$ *slaA* or  $\Delta$ *slaAB* mutant cells (Fig. 4b, 4d, 4f, and  
190 4h), confirming that SlaA contributes to the formation of the outermost layer. Additionally, the  
191 cell surface appeared diffuse in the  $\Delta$ *slaA* mutant cell, which was attributed to the periodic  
192 extensions of membrane proteins, likely including the SlaB protein, and/or their extensive N-  
193 glycosylation<sup>17</sup>. In the  $\Delta$ *slaB* mutant cell, a smooth outermost layer similar to the SlaA layer in  
194 wild-type cells was observed; however, it appears to be discontinuous around the cell membrane  
195 (Fig. 4c and 4g). The partial lattice of SlaA in the  $\Delta$ *slaB* mutant may be anchored by other  
196 membrane proteins even in the absence of SlaB, including the aforementioned M164\_1049.  
197 Together these images suggest additional components may contribute to the non-essential  
198 *Sulfolobus* S-layer<sup>17</sup>.

199

200 *Incomplete complementarity of reverse gyrase*

201 As an additional surprise from our genome-wide essential gene identification, we found  
202 incomplete complementarity between two copies of the reverse gyrase in *S. islandicus* M.16.4.  
203 Unlike Euryarchaota and most extremely thermophilic bacteria, Crenarchaeota possess two  
204 copies of reverse gyrase<sup>35,36</sup>, both believed to be essential for growth<sup>21,37</sup>. Tn-seq analysis  
205 indicated that the *topR1* (*M164\_1732*) was non-essential, which was confirmed by a successful  
206 disruption (Supplementary Fig. 1b). Interestingly, as mentioned above, *topR2* (*M164\_1245*)  
207 was called essential but we could not obtain *topR2* disruption mutants (Supplementary Fig. 1c) if  
208 we prolonged the incubation time (up to 14-20 days) of transformation plates in gene knockout  
209 experiments. These observations suggest that *topR2* plays a more important role than *topR1* in  
210 *Sulfolobus* cell survival at optimal temperature.

211

#### 212 *Lethal deletion mutants*

213 Tn-seq also uncovered genes that may not be essential to growth but instead are toxic when  
214 disrupted. Among them, arCOG analysis predicts that *M164\_0131*, *M164\_0217*, *M164\_0268*,  
215 *M164\_2076*, *M164\_1728*, and *M164\_1060* are antitoxin-encoding genes. We reason that  
216 inactivation of these antitoxin genes might cause overproduction of toxins and then trigger cell  
217 death. This finding suggests that associated toxins are constitutively expressed in our laboratory  
218 conditions. Interestingly, unlike most of the family II (VapBC) and family HEPN-NT  
219 toxin/antitoxin family gene pairs in *S. islandicus* M.16.4 (Supplementary Dataset 3), partners  
220 (toxin genes) adjacent to these predicted antitoxin genes (with the exception of *M164\_1060*;  
221 see Supplementary Fig. 6) were not observed. This indicates that VapB-VapC or HEPN-NT do  
222 not always correspond to their neighbors and some gene pairs might have exchanged  
223 counterparts. The Tn-seq-based analyses also classified *cas5* (*M164\_0911*), a part of the  
224 Cascade (CRISPR-associated complex for antiviral defense) complex<sup>38</sup>, as essential. Consistent  
225 with this assignment, disruption of *cas5* by replacing it with the *StoargD* marker cassette via  
226 homologous recombination failed after repeated attempts. However, the entire Type-IA module  
227 of CRISPR-Cas system, consisting of eight genes with *cas5* included, could be deleted from  
228 the *S. islandicus* M.16.4 chromosome with no detectable effect on cell growth (data not shown).  
229 One possible explanation is that in the absence of *cas5*, the Cascade complex becomes  
230 misfolded and thus toxic for the cells, but future studies are needed to confirm this interpretation.

231

#### 232 *Shared essential genes*

233 To establish how this essential gene set compares with those found in other organisms, we  
234 retrieved sets of essential genes from the database of essential genes<sup>25,39</sup> in 8 model organisms  
235 that span the tree of life<sup>26,40-44</sup>, including the minimal genes set in the JCVI Syn 3.0 *Mycoplasma*  
236 *mycoides* genome<sup>27</sup> (Fig. 5, Supplementary Dataset 4). We find that 242 *S. islandicus* essential  
237 genes are essential in at least one other organism we surveyed, while 192 essential genes are  
238 uniquely essential in *S. islandicus*. Eighty-nine genes are essential in representatives of all three  
239 domains (78 of which are also essential in Syn 3.0) (Supplementary Dataset 4). As shown in  
240 Fig. 5, comparisons of shared essential genes support the shared cellular systems between the

241 archaeal and eukaryotic domains. More total *S. islandicus* essential gene orthologs are shared  
 242 with archaea and eukaryotes (grey in Fig. 5), and more of these shared orthologs are essential  
 243 (colors), than are shared between *S. islandicus* and the bacteria we use for comparison. The  
 244 highest number of shared essential genes (187) is between *S. islandicus* and *M. maripaludis*  
 245 S2<sup>26</sup>, an organism from the euryarchaeal lineage of the archaeal domain (Table 1). The large  
 246 size of the essential gene set shared between *Sulfolobus* and *Methanococcus*, in spite of their  
 247 wildly different habitats and life styles, reinforces the fundamental nature of Archaea as a  
 248 distinct cell type<sup>45</sup>.

**Table 1: Number of *S. islandicus* essential genes shared and shared essential within 8 model organisms**

|          |                                  |           | Phyletic Category* |    |         |      |              |       |
|----------|----------------------------------|-----------|--------------------|----|---------|------|--------------|-------|
|          |                                  |           | Universal          | EA | Archaea | TACK | Sulfolobales | Other |
| Archaea  | <i>Methanococcus maripaludis</i> | Shared    | 128                | 77 | 42      | 2    | 2            | 42    |
|          |                                  | Essential | 93                 | 55 | 20      | 2    | 0            | 17    |
| Eukarya  | <i>Saccharomyces cerevisiae</i>  | Shared    | 134                | 77 | 2       | 0    | 1            | 27    |
|          |                                  | Essential | 68                 | 41 | 1       | 0    | 0            | 4     |
|          | <i>Schizosaccharomyces pombe</i> | Shared    | 134                | 78 | 2       | 0    | 1            | 26    |
|          |                                  | Essential | 82                 | 43 | 1       | 0    | 0            | 10    |
| Bacteria | <i>Bacteroides fragilis</i>      | Shared    | 124                | 10 | 0       | 0    | 2            | 40    |
|          |                                  | Essential | 70                 | 1  | 0       | 0    | 0            | 12    |
|          | <i>Bacillus subtilis</i>         | Shared    | 131                | 7  | 5       | 1    | 4            | 49    |
|          |                                  | Essential | 72                 | 0  | 0       | 0    | 0            | 11    |
|          | <i>Escherichia coli</i>          | Shared    | 136                | 7  | 6       | 0    | 8            | 64    |
|          |                                  | Essential | 73                 | 0  | 1       | 0    | 0            | 12    |
|          | <i>JCVI Syn 3.0</i>              | Shared    | 76                 | 2  | 0       | 0    | 0            | 10    |
|          |                                  | Essential | 76                 | 2  | 0       | 0    | 0            | 10    |

\* Genes are put into a category if they are present in >50% of the organisms in each group, i.e. universal is in >50 % of each of Bacteria, Archaea and Eukarya groups. "Other" refers to genes that do not meet these criteria.

249

#### 250 *Phyletic distributions of essential genes*

251 To investigate the broader phyletic distributions of *S. islandicus* essential genes, we used  
 252 assignments from the eggNOG database<sup>46</sup> (see Methods) to map the presence and absence of  
 253 putative essential gene orthologs from a previously published set of 169 complete genomes  
 254 representing major clades in all three domains<sup>6</sup> (Supplementary Dataset 5 and Supplementary  
 255 Dataset 6). Fig. 6 graphically shows the *S. islandicus* essential genes shared in other genomes  
 256 in a set of hierarchical clusters based on Euclidean distance. From this figure, 4 primary  
 257 transitions emerge in the evolution of the contemporary *S. islandicus* essential genome. The  
 258 number of genes in phyletic groups (Table 2) is significantly different from random sampling  
 259 among phyletic categories (Supplementary Table 4). Similarly ranked distributions are seen in  
 260 two additional datasets: 1) all genomes in the eggNOG database subsampled to have equal  
 261 representation in each domain, 2) all genomes in the eggNOG database for which assignments  
 262 are available. These data are supported by parsimony analysis with bootstrap support for the  
 263 grouping of each of the three major domains (Supplementary Fig. 7 and 8). Together these data

264 support four primary stages in the evolution of the contemporary *S. islandicus* cells and allow  
265 us to assign specific essential genes to these potential transitions in the evolution of the cell.

**Table 2: Number of *S. islandicus* essential genes shared with 168 full genome sequences spanning tree of life.**

|                              | Phyletic Category* |           |           |           |              |           |
|------------------------------|--------------------|-----------|-----------|-----------|--------------|-----------|
|                              | Universal          | EA        | Archaea   | TACK      | Sulfolobales | Other     |
| <b>Share Genes</b>           | <b>141</b>         | <b>80</b> | <b>55</b> | <b>18</b> | <b>73</b>    | <b>74</b> |
| <b>Poorly Characterized*</b> | 5                  | 1         | 14        | 7         | 46           | 3         |

\* Genes are put into a category if they are present in >50% of the organisms in each group, i.e. universal is in >50 % of each of Bacteria, Archaea and Eukarya groups. "Other" refers to genes that do not meet these criteria.

\*\* NOG categories "Function unknown" or "General functional prediction only". Full list shown in Supplemental Table 6

266

267

268 The highest number of essential genes are shared broadly across the tree of life (Universal in  
269 Table 2), supporting the early evolution of the majority of essential gene functions in the  
270 contemporary archaeal cell. Most of these have putative functional assignments in information  
271 processing, particularly translation and transcription (Supplementary Dataset 7). Many  
272 previous studies have reported the evolutionary conservation of information processing  
273 components going back to the Last Universal Common Ancestor (LUCA) using computational  
274 methods<sup>7-9,11,47</sup>. We find that in all studies the majority of conserved orthologous gene sets that  
275 we could interrogate in this system are essential (Supplementary Table 5 and Supplementary  
276 Dataset 8). Of the 200 metabolic COGs identified in the *S. islandicus* genome from a recent  
277 estimate of the LUCA gene set<sup>10</sup>, only 19 were found to be essential (Supplementary Dataset  
278 8). This is expected, due to our use of rich medium. The first phase of the cell contains the  
279 universal set of genes with conserved cellular components that are likely to have evolved early  
280 in evolutionary history remain essential components of the contemporary *S. islandicus* genome  
281 today.

282

283 The next largest category of essential genes is found between *Sulfolobus* and other organisms  
284 in the Eukarya/Archaea (EA) domains (Table 2). These genes are largely involved in core  
285 information processing functions and support the shared evolutionary ancestry of the Archaea  
286 and Eukarya after their divergence from Bacteria. Only one gene in this category is poorly  
287 characterized: *M164\_0237*, a homolog to eukaryotic *zpr1*. *zpr1* is a gene essential for  
288 transcription and cell cycle progression in fungal and mammalian cells<sup>48-51</sup>, and has recently  
289 been reported as a regulator of circadian rhythm in plants<sup>52</sup>. Though it has been noted that this  
290 gene is exclusively shared in EA<sup>51</sup>, it remains uncharacterized in the Archaea outside of our  
291 results recognizing its essentiality in *Sulfolobus* (Supplementary Table 6).

292

293 Fifty-five essential genes belong to NOGs that are shared by organisms in the archaeal domain  
294 (Table 2). Functional assignments of the archaeal-specific genes represent a diversity of  
295 functions split between core functions (translation, transcription, and replication) and peripheral  
296 functions such as transport, defense (including all the above-mentioned predicted antitoxin

297 genes), and metabolism. Archaea-specific DNA replication/recombination/repair genes are  
298 *nurA* and *gins15*, while genes in arCOG category “Transcription (K)” are largely transcription  
299 factors and do not represent core RNA polymerase functionality like the EA genes mentioned  
300 above. Fourteen of the archaeal-specific genes are poorly characterized (Table 2), 9 of which  
301 are also essential in *M. maripaludis* S2 (Supplementary Dataset 4). In an evolutionary context,  
302 this set of poorly characterized, but essential, archaea-specific genes are key target for future  
303 molecular characterization since they likely highlight the unique biology of archaeal cells. We  
304 also show that the majority of *S. islandicus* genes are conserved in evolutionary history through  
305 the archaeal domain.

306

307 The final set of essential genes are specific or largely specific to the Sulfolobales, most of which  
308 have uncharacterized functions (Table 2). The essentiality of these genes and whether they fit  
309 into central cellular functions as non-orthologous gene replacements or peripheral ones are  
310 important subjects of future work. This set of genes, unique to this lineage, may represent  
311 environmental adaptations. The fact that they are poorly characterized attests to the need for  
312 further study even in this model archaeon.

313

314 The phyletic distributions of essential gene orthologs describe more about the shared biology  
315 of organisms than about the evolutionary processes (invention, loss, and horizontal gene  
316 transfer) through which each combination of essential components evolved. The key next steps  
317 toward comparative cell biology will be understanding the functional interactions among  
318 essential genes so that new gene inventions, non-orthologous gene transfers, and/or loss of  
319 specific functions can be identified. From the unique perspective of the TACK archaea, this  
320 work provides a roadmap of genes whose future molecular and systems characterization are  
321 likely to provide further understanding for evolutionary steps in the Archaea.

322

## 323 **Conclusion**

324 This is the first comprehensive genome-wide study of essential gene content in a model  
325 crenarchaeon. Our profile of *S. islandicus* essential genes uncovers several surprising findings,  
326 most notably the non-essentiality of the *Sulfolobus* S-layer. Comparative phyletic patterns  
327 provide a perspective on the stages of evolution of the contemporary *S. islandicus*, its shared  
328 ancestry with the eukaryotes, and the key components that define its uniqueness as an archaeal  
329 cell.

330

## 331 **Methods**

### 332 **Strains and culture conditions**

333 The complete list of strains and plasmids used in this study is shown in Supplementary Table 7. All *S. islandicus*  
334 strains were routinely grown aerobically at 76-78 °C and pH 3.3 without shaking in basal salt medium<sup>32</sup> containing  
335 0.2% [wt/vol] dextrin (Sigma-Aldrich, USA) and 0.1% [wt/vol] tryptone (BD Biosciences, USA) (the medium is  
336 hereafter named as DY). When required, agmatine, uracil, and 5-FOA were added to a final concentration of 50  
337 µg/ml, 20 µg/ml, and 50 µg/ml respectively. For solid plates, 2 × DY medium was supplemented with 20 mM MgSO<sub>4</sub>



338 and 7 mM CaCl<sub>2</sub>·2H<sub>2</sub>O, and mixed with 1.4% gelrite (Sigma-Aldrich, USA) with a ratio of 1:1 [vol/vol]. Plates were  
339 put into sealed bags and generally incubated for 10-14 days at 76-78 °C. Cell culture growth was monitored by  
340 optical density measurements at 600 nm using a portable cell density meter (CO8000, WPA, Cambridge, United  
341 Kingdom).

342

## 343 **Methods**

### 344 **Construction of *S. islandicus* transposon mutant library**

345 The 755-bp *argD* gene cassette (*SsoargD*) was PCR-amplified from the genomic DNA of *S. solfataricus* P2 using  
346 the primer set *SsoargD*-F1/R1, introducing the Sall and XmaI sites respectively. The resultant PCR products were  
347 digested with Sall/XmaI, and then cloned into the EZ-Tn5™ pMOD™-2 <MCS> Transposon Construction Vector  
348 (Epicentre, USA) in the corresponding sites, generating pT-SsoargD. The Tn5 <SsoargD> transposon DNA was  
349 prepared by PCR amplification from linearized pT-SsoargD with 5'-phosphorylated primers PCRFP/PCRRP. The  
350 PCR products, consisting of a nutritional marker flanked by a 19-bp inverted repeat (Mosaic Ends, ME), were  
351 purified and highly concentrated using the DNA Clean & Concentrator™-5 kit (Zymo Research, USA). Preparation  
352 of transposomes was made in a 10 µl-reaction system as follows: 2.2 µg of transposon, 1 µl of EZ-Tn5 transposase  
353 (Epicentre, USA), and 2.5 µl of 100% glycerol. The reaction was incubated at room temperature for 30 min and then  
354 switched to 4 °C for another 72 hrs. 1-2 µl of transposomes were transformed into *S. islandicus* RJW008 ( $\Delta argD$ )  
355 via electroporation as described previously<sup>32</sup>. Cell transformation assays were repeated dozens of times in order to  
356 collect a sufficient number of transformants to achieve saturation mutagenesis. The theoretical number of transposon  
357 insertion colonies was calculated using a derivative of Poisson's law:  $N = \ln(1 - P)/\ln(1 - f)$ ,  $f$  = average gene size  
358 (900.64 bp) / genome size (2,586,647 bp). To make sure the transposon insertions cover approximately 99.99%  
359 ( $P=0.9999$ ) of the genome, around 26,448 colonies per library are required. The transformed cells were plated on  
360 DY plates either by glass beads or over-lay<sup>53</sup>. After 10 days of incubation, the ArgD<sup>+</sup> revertants were harvested from  
361 plates either by manually picking or with sterile spreaders, and then pooled into three independent transposon mutant  
362 libraries (CYZ-TL1, CYZ-TL2, and CYZ-TL3), with approximately 100,000 colonies in total (Supplementary Table  
363 1). We routinely obtained an average of *ca.* 10<sup>3</sup> colonies/µg transposon, and approximately 10<sup>5</sup> colonies/µg DNA  
364 using a replicative plasmid pSeSd-SsoargD. The pSeSd-SsoargD was constructed by cloning the *SsoargD* marker  
365 cassette, amplified from *S. solfataricus* P2 genomic DNA with primer set *SsoargD*-F2/R2, into the XmaI site of a  
366 *Sulfolobus-E.coli* shuttle vector pSeSd<sup>54</sup>. Thus, the estimated frequency of transposition is ~10<sup>-2</sup> per cell.

367

### 368 **DNA library preparation and high-throughput DNA sequencing**

369 Genomic DNA from each mutant pool was extracted as described previously<sup>55</sup> and then quantified with Qubit® 2.0  
370 Fluorometer (Invitrogen, USA). DNA libraries were prepared using the Nextera XT DNA Library Prep Kit (Illumina,  
371 USA) with proper modifications. Briefly, 2 ng of input genomic DNA in total was simultaneously fragmented and  
372 tagged with sequencing adapters in a single enzymatic reaction tube. Afterwards, a primer mixture of Tn-seq-F  
373 (Supplementary Dataset 9) and N705 (a randomly selected primer from the Nextera XT DNA Library Prep Kit) was  
374 added in the same tube to enrich the transposon-chromosome junction regions via PCR. The PCR conditions were  
375 as follows: 72°C for 3 minutes, 95°C for 30 seconds, and 22 cycles of denaturation at 95°C for 10 seconds, annealing  
376 at 55°C for 30 seconds, and extension at 72°C for 30 seconds. A final extension was performed at 72 °C for 5 min.  
377 The resultant library DNA was cleaned up with AMPure XP beads for three times, eluted in 45-µl EB buffer  
378 (QIAprep Spin Miniprep Kit, USA), and then quantified with Qubit® 2.0 Fluorometer. The final DNA library was  
379 quantitated on High-Sensitivity Qubit (Life Technologies) and fragment size was evaluated using the Agilent 2100  
380 Bioanalyzer on a DNA7500 chip (Agilent Technologies), then further quantitated by qPCR on a BioRad CFX  
381 Connect Real-Time System (Bio-Rad Laboratories, Inc. CA) to ensure accuracy of quantitation of the library  
382 containing properly adapted fragments. The final pool was loaded onto two lanes (CYZ\_TL1) and 1 lane each  
383 (CYZ\_TL2 and CYZ\_TL3) of a HiSeq 2500 Rapid flowcell for cluster formation and sequencing on an Illumina  
384 HiSeq 2500 with Rapid SBS sequencing reagents version 2. Sequencing by synthesis was performed from one end  
385 of the molecules for a total read length of 160 nt. The 100 µM of custom Read 1 sequencing primer, specific for the  
386 Tn-seq-F sequence (Supplementary Dataset 9), was spiked into the standard Read1 HP10 primer tube (position 18)

387 for sequencing. The run generated .bcl files, which were converted into demultiplexed compressed fastq files using  
388 bcl2fastq v1.8.4 Conversion Software (Illumina, CA) at the W. M. Keck Center for Comparative and Functional  
389 Genomics at the University of Illinois at Urbana-Champaign.

390

#### 391 **Tn-seq data processing and analysis**

392 Illumina FASTQ reads from all three libraries that were fewer than 50 bp in length, had a quality score below 30,  
393 and did not contain the 23-bp transposon sequence were removed. The remaining reads were stripped of transposon  
394 and adapter sequence and aligned to the *S. islandicus* M.16.4 genome (NC\_012726) using the Burrows-Wheeler  
395 Bowtie 2 alignment tool<sup>56</sup>. Reads that mapped to multiple locations in the genome or to ambiguous sites were set  
396 aside, as were those with an alignment length less than 11 base pairs. Using in-house software, the resulting .sam  
397 alignment files were converted to lists that included unique insertion locations, the strand to which they aligned, and  
398 the number of reads associated with that event (Supplementary Dataset 1). Insertions that occurred in the same  
399 location but on different strands or in separate libraries were considered independent events. Tn5 transposase has  
400 been shown to prefer certain insertion sites over others<sup>57</sup>, so each reported site was extracted and nucleotide  
401 frequency was measured 20 bases up-and-downstream as compared to an equal number of random sites in the  
402 genome. Random sampling via the Python numpy.random.choice function (with replacement) yielded sites with  
403 overall frequencies matching the known G+C content of the genome (35%), but a pronounced and palindromic  
404 pattern was observed at insertion sites even when normalizing for this bias (Supplementary Fig. 9). Overall Tn5  
405 appears to prefer a G-C base pair flanked by an AT-rich region, which is consistent with other studies<sup>57,58</sup>. However,  
406 when normalized to the overall G+C content, no single biased site was more than 2-fold enriched in a certain base  
407 compared to the rest of the genome, meaning there was considerable variation in the sites themselves and thus the  
408 chance that the bias would significantly affect our results is reduced. Gene essentiality was then evaluated using  
409 software previously designed and published for this purpose: Tn-Seq Explorer<sup>19</sup> and ESSENTIALS<sup>18</sup>. The  
410 ESSENTIALS software was run with mostly default settings with a list of insertion locations and associated reads  
411 as the input. The locations for each of the three libraries were submitted as separate files and the total library size  
412 specified as 105,968 (Supplementary Table 1). Repeat filtering was enabled to avoid calling repeated regions as  
413 essential. The LOESS smoothing feature normally meant to compensate for the over-representation of bacterial  
414 origins of replication (caused by multiple simultaneous replication rounds) was disabled because *Sulfolobus* only  
415 undergoes one round of replication per cell cycle<sup>59</sup>. Because of the lack of observed sequence specificity, the insertion  
416 site was specified as “random.” The program uses “log<sub>2</sub>FC” as its measure of essentiality, which is proportional to  
417 log<sub>2</sub> (reads observed/reads expected) for each gene and sets a cutoff automatically as the local minimum between  
418 essential and non-essential distributions in a density plot of the scores. The program suggested a putative maximum  
419 log<sub>2</sub>FC of -5.1 for essential genes.

420 For the Tn-Seq Explorer software, insertion sites of all three libraries were combined and insertion sites with fewer  
421 than 4 reads were excluded for analysis due to their vast over-representation in the insertion sites and the uncertainty  
422 of their source (Supplementary Table 1). The program uses a sliding window approach and returns an essentiality  
423 index (EI) based on the number, location, and spatial concentration of insertion sites within each individual gene. It  
424 also allows for the adjustment of the stated start and end points of the gene. As is default, insertions in the first 5%  
425 and last 20% of genes were excluded to compensate for misannotated start codons and proteins for which C-terminal  
426 deletions are tolerated, respectively. The program suggested an EI maximum of 3 (Fig. 1b).

427

#### 428 **Construction of gene replacement and markerless in-frame deletion mutants in *S. islandicus***

429 Except where otherwise stated, disruption of the chromosomal genes was achieved by replacing their coding regions  
430 (57%-100% of the length of the gene was deleted) with the *argD* expression cassette (*StoargD*) derived from *S.*  
431 *tokodaii* via a microhomology-mediated gene inactivation approach we recently developed<sup>60</sup>. Briefly, a functional  
432 *argD* gene was PCR-amplified from a linearized *Sulfolobus-E.coli* shuttle vector pSesD-StoargD with 35-40 bp  
433 homology of the targeted gene introduced, yielding the gene disruption cassettes. The resultant PCR products were  
434 purified and electroporated into the *argD* auxotrophic strain *S. islandicus* RJW008, selecting ArgD<sup>+</sup> transformants

435 on the plates lacking agmatine. S-layer genes *slaA*, *slaB*, and *slaAB* were deleted from the chromosome of the genetic  
436 host *S. islandicus* RJW004 via an improved MID strategy<sup>32,61</sup> with knockout plasmids pMID-slaA, pMID-slaB, and  
437 pMID-slaAB, respectively. The resulting  $\Delta slaA$  and  $\Delta slaB$  mutants harbored an in-frame deletion of the coding  
438 region from nucleotides +52 to +3687 relative to the start codon of *slaA* (3690 bp in length), and +13 to +1185  
439 relative to the start codon of *slaB* (1194 bp in length), respectively. The  $\Delta slaAB$  mutant was constructed similarly  
440 leaving 51 bp of the *slaA* (nt 1 to 51 relative to the start codon of *slaA*), 6 bp of restriction enzyme (MluI) site, and  
441 9 bp of *slaB* (nt 1186 to 1194 relative to the start codon of *slaB*) in the chromosome of *S. islandicus* RJW004.  
442 Verification of each gene replacement or deletion mutant was determined through PCR diagnosis with both flanking  
443 primers (bind outside of the targeted region) and internal primers (bind inside of targeted region), which examined  
444 the genotype and purity of mutants respectively. The primers used to generate and confirm gene disruptions or  
445 deletions were described in the Supplementary Dataset 9, and the expected sizes of amplicons generated from the  
446 genetic host (wt) and mutant strains were provided in the Supplementary Table 8.

447

#### 448 **Transmission electron microscopy (TEM)**

449 Proteinaceous S-layer was extracted from *S. islandicus* cell cultures as described previously<sup>33</sup>. To prepare the samples  
450 that were used for TEM, glow-discharged, carbon-stabilized Formvar-coated 200-mesh copper grids (Carbon Type-  
451 B, cat. no. 01811, Ted Pella, Inc., USA) were placed on 8- to 20- $\mu$ l droplets of each sample for 3 minutes, rinsed  
452 with deionized water, and negative-stained with 2% uranyl acetate for 15-60 seconds. Thin-sectioned *S. islandicus*  
453 cells were prepared essentially as described previously<sup>62</sup>, with minor modifications as follows: after microwave  
454 fixation with the primary fixative, cells were washed in Sorenson's Phosphate buffer with no further additives. All  
455 samples were observed using a Philips CM200 transmission electron microscope at 120 kV. Images were taken at  
456 various magnifications using a TVIPS (Tietz Video and Image Processing Systems GmbH; Germany) 2k  $\times$  2k  
457 Peltier-cooled CCD camera. Scale bars were added with ImageJ software.

458

#### 459 **Homology search**

460 Homologs for the 441 essential genes found in Supplementary Dataset 2 were found across the 168 genomes listed  
461 in Supplementary Dataset 6 via the European Molecular Biology Laboratory evolutionary genealogy of genes Non-  
462 supervised Orthologous Groups (EMBL eggNOG) database<sup>46</sup>. Genomes were downloaded from the National Center  
463 for Biotechnology Information ([www.ncbi.nlm.nih.gov](http://www.ncbi.nlm.nih.gov)). The genomes to survey are based on the set<sup>6</sup> in Raymann,  
464 *et al.* 2015 with the following additions: *M. maripaludis* S2 was added to compare essential gene content; the genome  
465 of *Toxoplasma gondii* ME49 was added because its essential genome became available during the course of this  
466 analysis<sup>63</sup>; *Schizosaccharomyces pombe*<sup>64</sup> was added to compare with *Saccharomyces cerevisiae* S288C; additional  
467 Sulfolobales genomes were added for intra-order comparison of essential gene content (listed in Supplementary  
468 Dataset 6). While not included in the phyletic distribution analysis, the sequences for *Lokiarchaeum* sp. GC14\_75<sup>14</sup>  
469 and Thorarchaeota<sup>65</sup> SMTZ-45, SMTZ1-45, and SMTZ1-83 were retrieved and analyzed; presence/absence data can  
470 be found in Supplementary Dataset 5. Several bacterial genomes were added to include additional model systems  
471 (e.g. *E. coli* str. K-12 substr. MG1655 and *Bacillus subtilis* subsp. *subtilis* str. 168). The complete list is found in  
472 Supplementary Dataset 6. Due to their incomplete or highly reduced nature, we excluded DPANN and Asgard  
473 lineages, as well as Bacteria from the candidate phyla radiation<sup>66</sup> and the minimal *Mycoplasma* Syn 3.0<sup>27</sup>; however,  
474 presence/absence information for selected genomes are provided in Supplementary Dataset 5. For organisms not in  
475 the eggNOG database, the amino acid sequences of protein-coding genes were uploaded to the eggNOG mapper tool  
476 (<http://eggnogdb.embl.de/#/app/emapper>) and run with default settings. These data were translated into a  
477 presence/absence matrix and evaluated with custom Python and Zsh scripts to assess the phyletic distribution of  
478 essential gene candidates. Finally, for each *S. islandicus* M.16.4 essential gene candidate, the amino acid sequences  
479 of all bidirectional best BLAST hits of that gene were used to scan genomes in which no homologs were found  
480 search using tBLASTn, and the results were filtered according to the same cutoff criteria as the bidirectional best  
481 BLAST hits. This was to fill in gaps left by annotation mistakes, where the protein may still be in the genome but  
482 was not published as such. The tBLASTn hits that overlapped with annotated genes by more than 50 base-pairs were

483 discarded because the search was explicitly for finding missing annotations. Presence/absence patterns of NOG  
484 homologs were combined with tBLASTn data to create binary matrices.

485

#### 486 **Parsimony analysis**

487 Presence/absence matrices were converted to NEXUS format files with a custom Python script and used in the  
488 Phylogenetic Analysis Using Parsimony (and other methods) (PAUP\*) tool<sup>67</sup>. The main tree was found with the  
489 heuristic search function with a maximum of 1000 trees in memory, default settings. The first tree was saved as an  
490 unrooted NEXUS format tree with branch lengths. Bootstrapping was run with default settings for 1000 iterations  
491 with 100 maximum trees in memory. The resulting tree was saved with support values as node labels. A custom  
492 python script using the Phylo package within the Biopython<sup>68</sup> suite was used to transfer the support values from the  
493 bootstrap consensus tree to the corresponding nodes on the heuristic search tree. Trees were visualized in the  
494 interactive tree of life (iTOL)<sup>69</sup> interface.

495

#### 496 **Phyletic distribution analysis**

497 The presence/absence matrices were also cross-referenced with phylogenetic data via NCBI taxonomy information  
498 to determine how widespread each gene was in different orders spanning the tree of life. Simulated random  
499 distributions of genes were created by counting how many organisms in which they were found and assigning that  
500 many random organisms to each gene (without replacement) for each gene 100 times using the `numpy.random.choice`  
501 function. P-values were generated by counting the number of simulated observations above or below the true  
502 observation and dividing by 100. To determine the proportion of COGs or arCOGs that have essential members in  
503 *S. islandicus*, we removed unique clusters with more than one gene in *S. islandicus* that showed no essentiality from  
504 the total due to possible redundancy in functional orthologs from the same cluster. To test for bias in the phyletic  
505 sampling of the set of 169 genomes, we assembled 100 organism sets with genomes randomly sampled from the  
506 eggNOG database to equal proportions of TACK archaea, euryarchaeota, eukaryotes, and bacteria as to that in the  
507 169 genome set. Organisms were chosen at random without replacement using the `numpy.random.choice` function  
508 again. In all data involving the eggNOG database, organisms missing from the NOG members file were excluded.

509

#### 510 **Life Sciences Reporting Summary**

511 Further information on experimental design is available in the Life Sciences Reporting Summary.

512

#### 513 **Code availability**

514 The custom Python and Zsh scripts used for analyses in this study are available upon request.

515

#### 516 **Data availability**

517 The raw Tn-seq data of three independent transposon insertion libraries CYZ-TL1, CYZ-TL2, and CYZ-TL3  
518 have been deposited at NCBI under BioSample accessions SAMN08628694, SAMN08628695,  
519 SAMN08628696, respectively, Bioproject accession PRJNA436600, and Sequence Read Archive (SRA)  
520 accession SRP133799. Analyzed data showing the insertion locations across three independent transposon  
521 libraries can be found in Supplementary Dataset 1. All other data that support the findings of this work are  
522 available from the corresponding author upon request.

523

#### 524 **Acknowledgments**

525 We thank Chris L. Wright and Alvaro G. Hernandez from W.M. Keck Center for Comparative  
526 and Functional Genomics, University of Illinois at Urbana-Champaign (UIUC), for advice with  
527 primer design, DNA library construction and sequencing. We also thank Whitney E. England,  
528 Angelo Blancaf and Ted Kim for assistance in Tn-seq data processing; Carlos A. Vega,  
529 Elizabeth H. Marr, and Melinda E. Baughman for providing technical assistance in collecting

530 transposon insertion colonies. We thank Isaac K.O. Cann and Scott C. Dawson for fruitful  
531 discussions. We are thankful to Kira S. Makarova for technical assistance with data retrieval  
532 from the arCOG database and for helpful suggestions. We thank Marleen van Wolferen for  
533 providing the S-layer extraction protocol. We acknowledge Yuan Li and Emily N. Hallett for  
534 providing S-layer extraction assistance. We would also like to thank Scott J. Robinson from  
535 Beckman Institute for Advance Science and Technology, UIUC, for technical assistance with  
536 TEM imaging and sample preparation. We thank Lou A. Miller from Frederick Seitz Materials  
537 Research Laboratory Central Research Facilities, UIUC, for preparing the thin-sectioned *S.*  
538 *islandicus* cells. Funding for this work was mainly provided by the National Aeronautics and  
539 Space Administration (NASA) through the NASA Astrobiology Institute under cooperative  
540 agreement no. NNA13AA91A, issued through the Science Mission Directorate. This work was  
541 also partially supported by Division of Environmental Biology (DEB: 1355171 to R.J.W.), US  
542 National Science Foundation, the Department of Microbiology Alice Helm Graduate Research  
543 Excellence Fellowship, UIUC (to A.P.R.P.), the Carl R. Woese Institute for Genomic Biology  
544 Undergraduate Research Scholar program, and the Office of Undergraduate Research, UIUC  
545 (to R.L.W).

546

#### 547 **Author Contributions**

548 C.Z., A.P.R.P., and R.J.W. conceived and designed the research; C.Z. and R.L.W. carried out  
549 experimental work; A.P.R.P., C.Z., G.J.O., R.L.W., and R.J.W. analyzed the data; R.J.W. and  
550 G.J.O contributed new reagents/analytic tools; and C.Z., A.P.R.P., and R.J.W. wrote the paper.  
551 All authors edited the manuscript.

552

553

#### 554 **References**

- 555 1. Woese, C. R. & Fox, G. E. Phylogenetic structure of the prokaryotic domain: the  
556 primary kingdoms. *Proc. Natl. Acad. Sci.* **74**, 5088–5090 (1977).
- 557 2. Woese, C. R. & Fox, G. E. The concept of cellular evolution. *J. Mol. Evol.* **10**, 1–6  
558 (1977).
- 559 3. Iwabe, N., Kuma, K., Hasegawa, M., Osawa, S. & Miyata, T. Evolutionary  
560 relationship of archaeobacteria, eubacteria, and eukaryotes inferred from  
561 phylogenetic trees of duplicated genes. *Proc. Natl. Acad. Sci.* **86**, 9355–9359  
562 (1989).



- 563 4. Woese, C. R., Kandler, O. & Wheelis, M. L. Towards a natural system of  
564 organisms: proposal for the domains Archaea, Bacteria, and Eucarya. *Proc. Natl.*  
565 *Acad. Sci.* **87**, 4576–4579 (1990).
- 566 5. Guy, L. & Ettema, T. J. G. The archaeal ‘TACK’ superphylum and the origin of  
567 eukaryotes. *Trends Microbiol.* **19**, 580–587 (2011).
- 568 6. Raymann, K., Brochier-Armanet, C. & Gribaldo, S. The two-domain tree of life is  
569 linked to a new root for the Archaea. *Proc. Natl. Acad. Sci.* **112**, 6670–6675 (2015).
- 570 7. Puigbò, P., Wolf, Y. I. & Koonin, E. V. Search for a ‘Tree of Life’ in the thicket of  
571 the phylogenetic forest. *J. Biol.* **8**, 59 (2009).
- 572 8. Harris, J. K., Kelley, S. T., Spiegelman, G. B. & Pace, N. R. The Genetic Core of  
573 the Universal Ancestor. *Genome Res.* **13**, 407–412 (2003).
- 574 9. Gil, R. *et al.* The genome sequence of *Blochmannia floridanus*: Comparative  
575 analysis of reduced genomes. *Proc. Natl. Acad. Sci.* **100**, 9388–9393 (2003).
- 576 10. Weiss, M. C. *et al.* The physiology and habitat of the last universal common  
577 ancestor. *Nat. Microbiol.* **1**, 16116 (2016).
- 578 11. Mirkin, B. G., Fenner, T. I., Galperin, M. Y. & Koonin, E. V. Algorithms for  
579 computing parsimonious evolutionary scenarios for genome evolution, the last  
580 universal common ancestor and dominance of horizontal gene transfer in the  
581 evolution of prokaryotes. *BMC Evol. Biol.* **3**, 2 (2003).
- 582 12. Makarova, K., Wolf, Y. & Koonin, E. Archaeal Clusters of Orthologous Genes  
583 (arCOGs): An Update and Application for Analysis of Shared Features between  
584 Thermococcales, Methanococcales, and Methanobacteriales. *Life* **5**, 818–840  
585 (2015).
- 586 13. Rivera, M. C. & Lake, J. A. The ring of life provides evidence for a genome  
587 fusion origin of eukaryotes. *Nature* **431**, 152 (2004).
- 588 14. Spang, A. *et al.* Complex archaea that bridge the gap between prokaryotes and  
589 eukaryotes. *Nature* **521**, 173–179 (2015).

- 590 15. Eme, L., Spang, A., Lombard, J., Stairs, C. W. & Ettema, T. J. G. Archaea and  
591 the origin of eukaryotes. *Nat. Rev. Microbiol.* **15**, nrmicro.2017.133 (2017).
- 592 16. Zaremba-Niedzwiedzka, K. *et al.* Asgard archaea illuminate the origin of  
593 eukaryotic cellular complexity. *Nature* **541**, 353–358 (2017).
- 594 17. Albers, S.-V. & Meyer, B. H. The archaeal cell envelope. *Nat. Rev. Microbiol.*  
595 **9**, 414–426 (2011).
- 596 18. Zomer, A., Burghout, P., Bootsma, H. J., Hermans, P. W. M. & van Hijum, S.  
597 A. F. T. ESSENTIALS: Software for Rapid Analysis of High Throughput  
598 Transposon Insertion Sequencing Data. *PLoS ONE* **7**, e43012 (2012).
- 599 19. Solaimanpour, S., Sarmiento, F. & Mrázek, J. Tn-Seq Explorer: A Tool for  
600 Analysis of High-Throughput Sequencing Data of Transposon Mutant Libraries.  
601 *PLOS ONE* **10**, e0126070 (2015).
- 602 20. Zhang, C., She, Q., Bi, H. & Whitaker, R. J. The apt/6-Methylpurine  
603 Counterselection System and Its Applications in Genetic Studies of the  
604 Hyperthermophilic Archaeon *Sulfolobus islandicus*. *Appl. Environ. Microbiol.* **82**,  
605 3070–3081 (2016).
- 606 21. Zhang, C. *et al.* Genetic manipulation in *Sulfolobus islandicus* and functional  
607 analysis of DNA repair genes. *Biochem. Soc. Trans.* **41**, 405–410 (2013).
- 608 22. Song, X., Huang, Q., Ni, J., Yu, Y. & Shen, Y. Knockout and functional  
609 analysis of two DExD/H-box family helicase genes in *Sulfolobus islandicus*  
610 REY15A. *Extremophiles* **20**, 537–546 (2016).
- 611 23. Liu, J. *et al.* Functional assignment of multiple ESCRT-III homologs in cell  
612 division and budding in *Sulfolobus islandicus*. *Mol. Microbiol.* n/a-n/a  
613 doi:10.1111/mmi.13716
- 614 24. Hong, Y. *et al.* Dissection of the functional domains of an archaeal Holliday  
615 junction helicase. *DNA Repair* **11**, 102–111 (2012).

- 616 25. Luo, H., Lin, Y., Gao, F., Zhang, C.-T. & Zhang, R. DEG 10, an update of the  
617 database of essential genes that includes both protein-coding genes and noncoding  
618 genomic elements. *Nucleic Acids Res.* **42**, D574–D580 (2014).
- 619 26. Sarmiento, F., Mrazek, J. & Whitman, W. B. Genome-scale analysis of gene  
620 function in the hydrogenotrophic methanogenic archaeon *Methanococcus*  
621 *maripaludis*. *Proc. Natl. Acad. Sci.* **110**, 4726–4731 (2013).
- 622 27. Hutchison, C. A. *et al.* Design and synthesis of a minimal bacterial genome.  
623 *Science* **351**, aad6253–aad6253 (2016).
- 624 28. Taylor, K. A., Deatherage, J. F. & Amos, L. A. Structure of the S-layer of  
625 *Sulfolobus acidocaldarius*. *Nature* **299**, 840 (1982).
- 626 29. Baumeister, W., Wildhaber, I. & Phipps, B. M. Principles of organization in  
627 eubacterial and archaeobacterial surface proteins. *Can. J. Microbiol.* **35**, 215–227  
628 (1989).
- 629 30. Veith, A. *et al.* *Acidianus*, *Sulfolobus* and *Metallosphaera* surface layers:  
630 structure, composition and gene expression. *Mol. Microbiol.* **73**, 58–72 (2009).
- 631 31. Rodrigues-Oliveira, T., Belmok, A., Vasconcellos, D., Schuster, B. & Kyaw, C.  
632 M. Archaeal S-Layers: Overview and Current State of the Art. *Front. Microbiol.* **8**,  
633 (2017).
- 634 32. Zhang, C., Cooper, T. E., Krause, D. J. & Whitaker, R. J. Augmenting the  
635 Genetic Toolbox for *Sulfolobus islandicus* with a Stringent Positive Selectable  
636 Marker for Agmatine Prototrophy. *Appl. Environ. Microbiol.* **79**, 5539–5549  
637 (2013).
- 638 33. Peyfoon, E. *et al.* The S-Layer Glycoprotein of the Crenarchaeote *Sulfolobus*  
639 *acidocaldarius* Is Glycosylated at Multiple Sites with Chitobiose-Linked N-  
640 Glycans. *Archaea* **2010**, (2010).
- 641 34. Reitz, T. *et al.* Spectroscopic study on uranyl carboxylate complexes formed at  
642 the surface layer of *Sulfolobus acidocaldarius*. *Dalton Trans.* **44**, 2684–2692  
643 (2015).

- 644 35. Forterre, P. A hot story from comparative genomics: reverse gyrase is the only  
645 hyperthermophile-specific protein. *Trends Genet.* **18**, 236–237 (2002).
- 646 36. Brochier-Armanet, C. & Forterre, P. Widespread distribution of archaeal  
647 reverse gyrase in thermophilic bacteria suggests a complex history of vertical  
648 inheritance and lateral gene transfers. *Archaea* **2**, 83–93 (2006).
- 649 37. Han, W., Feng, X. & She, Q. Reverse Gyrase Functions in Genome Integrity  
650 Maintenance by Protecting DNA Breaks In Vivo. *Int. J. Mol. Sci.* **18**, 1340 (2017).
- 651 38. Lintner, N. G. *et al.* Structural and Functional Characterization of an Archaeal  
652 Clustered Regularly Interspaced Short Palindromic Repeat (CRISPR)-associated  
653 Complex for Antiviral Defense (CASCADE). *J. Biol. Chem.* **286**, 21643–21656  
654 (2011).
- 655 39. Zhang, R. & Lin, Y. DEG 5.0, a database of essential genes in both  
656 prokaryotes and eukaryotes. *Nucleic Acids Res.* **37**, D455–D458 (2009).
- 657 40. Giaever, G. *et al.* Functional profiling of the *Saccharomyces cerevisiae*  
658 genome. *nature* **418**, 387–391 (2002).
- 659 41. Kim, D.-U. *et al.* Analysis of a genome-wide set of gene deletions in the  
660 fission yeast *Schizosaccharomyces pombe*. *Nat. Biotechnol.* **28**, 617–623 (2010).
- 661 42. Veeranagouda, Y., Husain, F., Tenorio, E. L. & Wexler, H. M. Identification of  
662 genes required for the survival of *B. fragilis* using massive parallel sequencing of a  
663 saturated transposon mutant library. *BMC Genomics* **15**, 429 (2014).
- 664 43. Kobayashi, K. *et al.* Essential *Bacillus subtilis* genes. *Proc. Natl. Acad. Sci.*  
665 **100**, 4678–4683 (2003).
- 666 44. M. Commichau, F., Pietack, N. & Stülke, J. Essential genes in *Bacillus*  
667 *subtilis* : a re-evaluation after ten years. *Mol. Biosyst.* **9**, 1068–1075 (2013).
- 668 45. Woese, C. R. On the evolution of cells. *Proc. Natl. Acad. Sci.* **99**, 8742–8747  
669 (2002).

- 670 46. Huerta-Cepas, J. *et al.* eggNOG 4.5: a hierarchical orthology framework with  
671 improved functional annotations for eukaryotic, prokaryotic and viral sequences.  
672 *Nucleic Acids Res.* **44**, D286–D293 (2016).
- 673 47. Ciccarelli, F. D. *et al.* Toward Automatic Reconstruction of a Highly Resolved  
674 Tree of Life. *Science* **311**, 1283 (2006).
- 675 48. Galcheva-Gargova, Z., Konstantinov, K. N., Wu, I.-H. & Klier, F. G. Binding  
676 of zinc finger protein ZPR1 to the epidermal growth factor receptor. *Science* **272**,  
677 1797 (1996).
- 678 49. Gangwani, L., Mikrut, M., Galcheva-Gargova, Z. & Davis, R. J. Interaction of  
679 ZPR1 with translation elongation factor-1 $\alpha$  in proliferating cells. *J. Cell Biol.* **143**,  
680 1471–1484 (1998).
- 681 50. Gangwani, L. Deficiency of the Zinc Finger Protein ZPR1 Causes Defects in  
682 Transcription and Cell Cycle Progression. *J. Biol. Chem.* **281**, 40330–40340  
683 (2006).
- 684 51. Mishra, A. K., Gangwani, L., Davis, R. J. & Lambright, D. G. Structural  
685 insights into the interaction of the evolutionarily conserved ZPR1 domain tandem  
686 with eukaryotic EF1A, receptors, and SMN complexes. *Proc. Natl. Acad. Sci.* **104**,  
687 13930–13935 (2007).
- 688 52. Kiełbowicz-Matuk, A., Czarnecka, J., Banachowicz, E., Rey, P. & Rorat, T.  
689 *Solanum tuberosum* ZPR1 encodes a light-regulated nuclear DNA-binding protein  
690 adjusting the circadian expression of StBBX24 to light cycle. *Plant Cell Environ.*  
691 **40**, 424–440 (2017).
- 692 53. Deng, L., Zhu, H., Chen, Z., Liang, Y. X. & She, Q. Unmarked gene deletion  
693 and host–vector system for the hyperthermophilic crenarchaeon *Sulfolobus*  
694 *islandicus*. *Extremophiles* **13**, 735 (2009).
- 695 54. Peng, N. *et al.* A Synthetic Arabinose-Inducible Promoter Confers High Levels  
696 of Recombinant Protein Expression in Hyperthermophilic Archaeon *Sulfolobus*  
697 *islandicus*. *Appl. Environ. Microbiol.* **78**, 5630–5637 (2012).



- 698 55. Reno, M. L., Held, N. L., Fields, C. J., Burke, P. V. & Whitaker, R. J.  
699 Biogeography of the *Sulfolobus islandicus* pan-genome. *Proc. Natl. Acad. Sci.* **106**,  
700 8605–8610 (2009).
- 701 56. Langmead, B. & Salzberg, S. L. Fast gapped-read alignment with Bowtie 2.  
702 *Nat. Methods* **9**, 357–359 (2012).
- 703 57. Green, B., Bouchier, C., Fairhead, C., Craig, N. L. & Cormack, B. P. Insertion  
704 site preference of Mu, Tn5, and Tn7 transposons. *Mob. DNA* **3**, 3 (2012).
- 705 58. Reznikoff, W. S. The Tn5 transposon. *Annu. Rev. Microbiol.* **47**, 945–964  
706 (1993).
- 707 59. Bernander, R. & Poplawski, A. Cell cycle characteristics of thermophilic  
708 archaea. *J. Bacteriol.* **179**, 4963–4969 (1997).
- 709 60. Zhang, C. & Whitaker, R. J. Microhomology-Mediated High-Throughput  
710 Gene Inactivation Strategy for the Hyperthermophilic Crenarchaeon *Sulfolobus*  
711 *islandicus*. *Appl. Environ. Microbiol.* **84**, e02167-17 (2018).
- 712 61. Zhang, C. *et al.* Revealing the essentiality of multiple archaeal pcna genes  
713 using a mutant propagation assay based on an improved knockout method.  
714 *Microbiology* **156**, 3386–3397 (2010).
- 715 62. Bautista, M. A., Zhang, C. & Whitaker, R. J. Virus-Induced Dormancy in the  
716 Archaeon *Sulfolobus islandicus*. *mBio* **6**, e02565-14 (2015).
- 717 63. Sidik, S. M. *et al.* A Genome-wide CRISPR Screen in *Toxoplasma* Identifies  
718 Essential Apicomplexan Genes. *Cell* **166**, 1423-1435.e12 (2016).
- 719 64. Wood, V. *et al.* The genome sequence of *Schizosaccharomyces pombe*. *Nature*  
720 **415**, 871 (2002).
- 721 65. Seitz, K. W., Lazar, C. S., Hinrichs, K.-U., Teske, A. P. & Baker, B. J.  
722 Genomic reconstruction of a novel, deeply branched sediment archaeal phylum  
723 with pathways for acetogenesis and sulfur reduction. *ISME J.* (2016).
- 724 66. Hug, L. A. *et al.* A new view of the tree of life. *Nat. Microbiol.* 16048 (2016).  
725 doi:10.1038/nmicrobiol.2016.48

- 726 67. Swofford, D. L. {PAUP\*. Phylogenetic analysis using parsimony (\* and other  
727 methods). Version 4.}. (2003).
- 728 68. Cock, P. J. A. *et al.* Biopython: freely available Python tools for computational  
729 molecular biology and bioinformatics. *Bioinformatics* **25**, 1422–1423 (2009).
- 730 69. Letunic, I. & Bork, P. Interactive tree of life (iTOL) v3: an online tool for the  
731 display and annotation of phylogenetic and other trees. *Nucleic Acids Res.* gkw290  
732 (2016). doi:10.1093/nar/gkw290  
733

## Figures and Legends

a

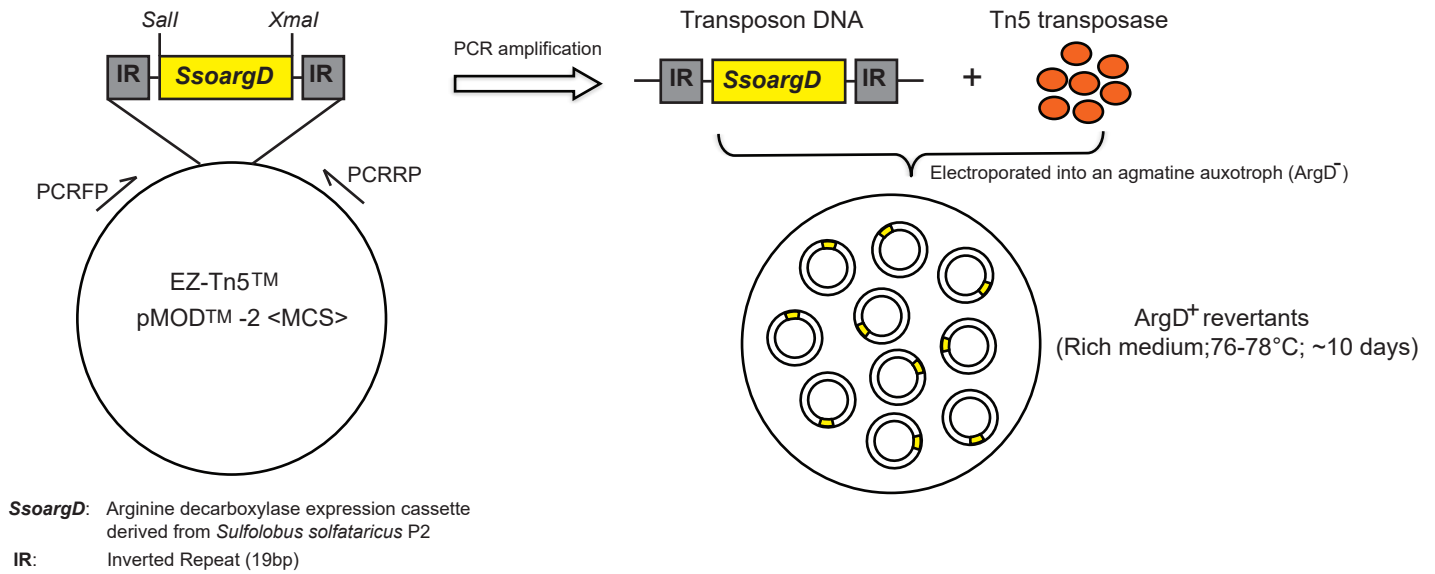

b

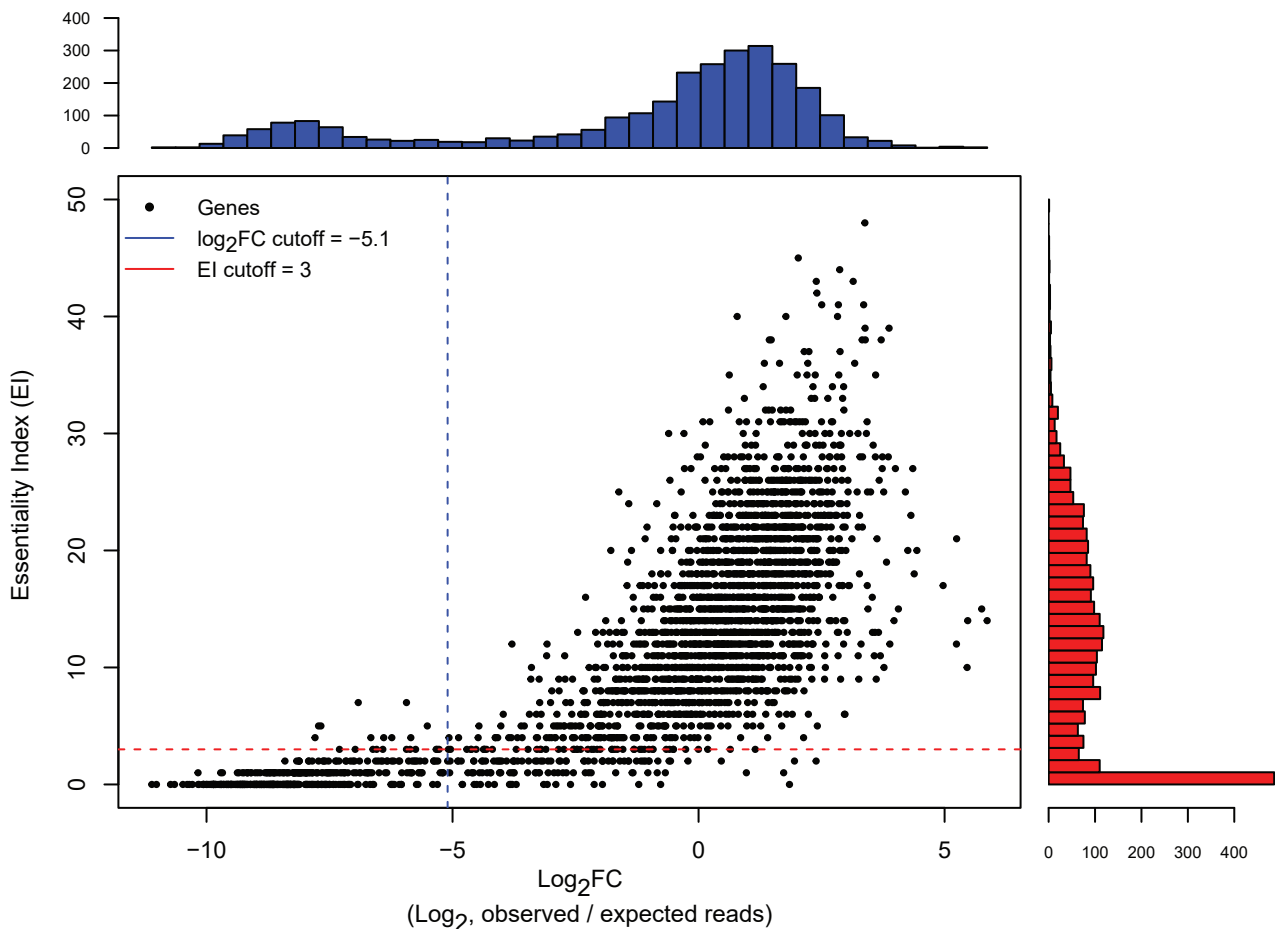

**Figure 1: Defining the essential genes in *S. islandicus* M.16.4.** a, Schematic overview of the genome-wide transposon mutagenesis strategy. b, Evaluation of gene essentiality by two computational programs: ESSENTIALS<sup>18</sup> and Tn-Seq-Explorer<sup>19</sup>. Points indicate individual genes plotted according to the scores returned by each program. Histograms indicate the number of genes of a particular score, and the dotted lines indicate the recommended cutoffs returned by each program as the local minimum between the essential and the non-essential score distributions. Essential genes meet both criteria (lower-left quadrant). The protein-coding genes that only met the ESSENTIALS or Tn-Seq-Explorer criteria were deemed as “unassigned candidates” leaving the rest as likely non-essential to *S. islandicus* M.16.4 growth under these conditions. A complete list of the  $\log_2FC$  and EI for the *S. islandicus* M.16.4 genes from the combined mutant libraries are provided in Supplemental Dataset 2.

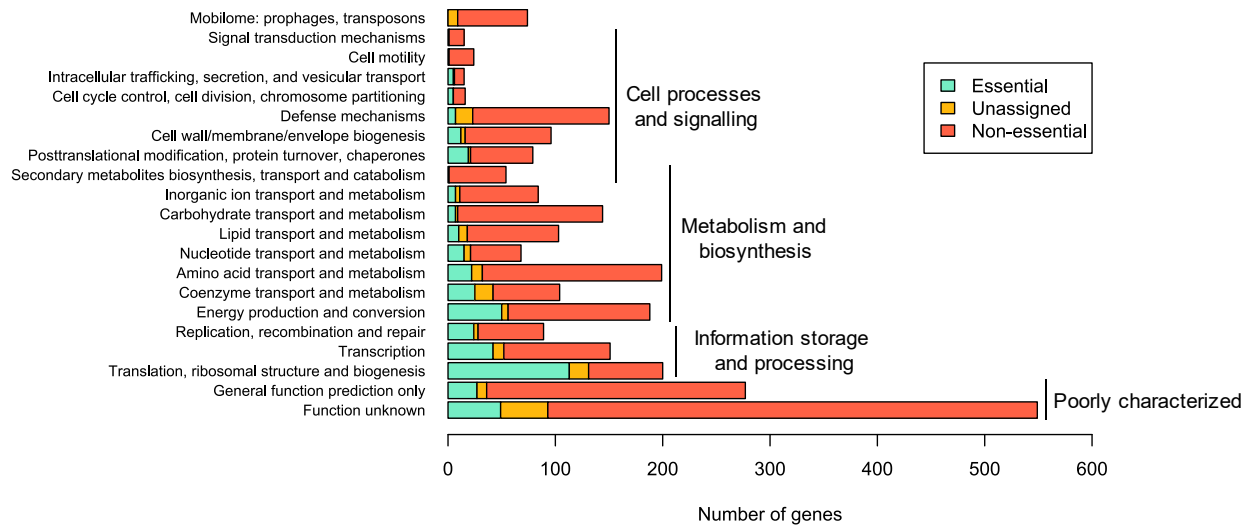

**Figure 2: arCOG category and essentiality criteria for protein-coding genes in *S. islandicus* M.16.4.** Functional distribution of essential, non-essential, and unassigned genes via arCOG category. Essentiality criteria based on cutoffs in Fig. 1b.

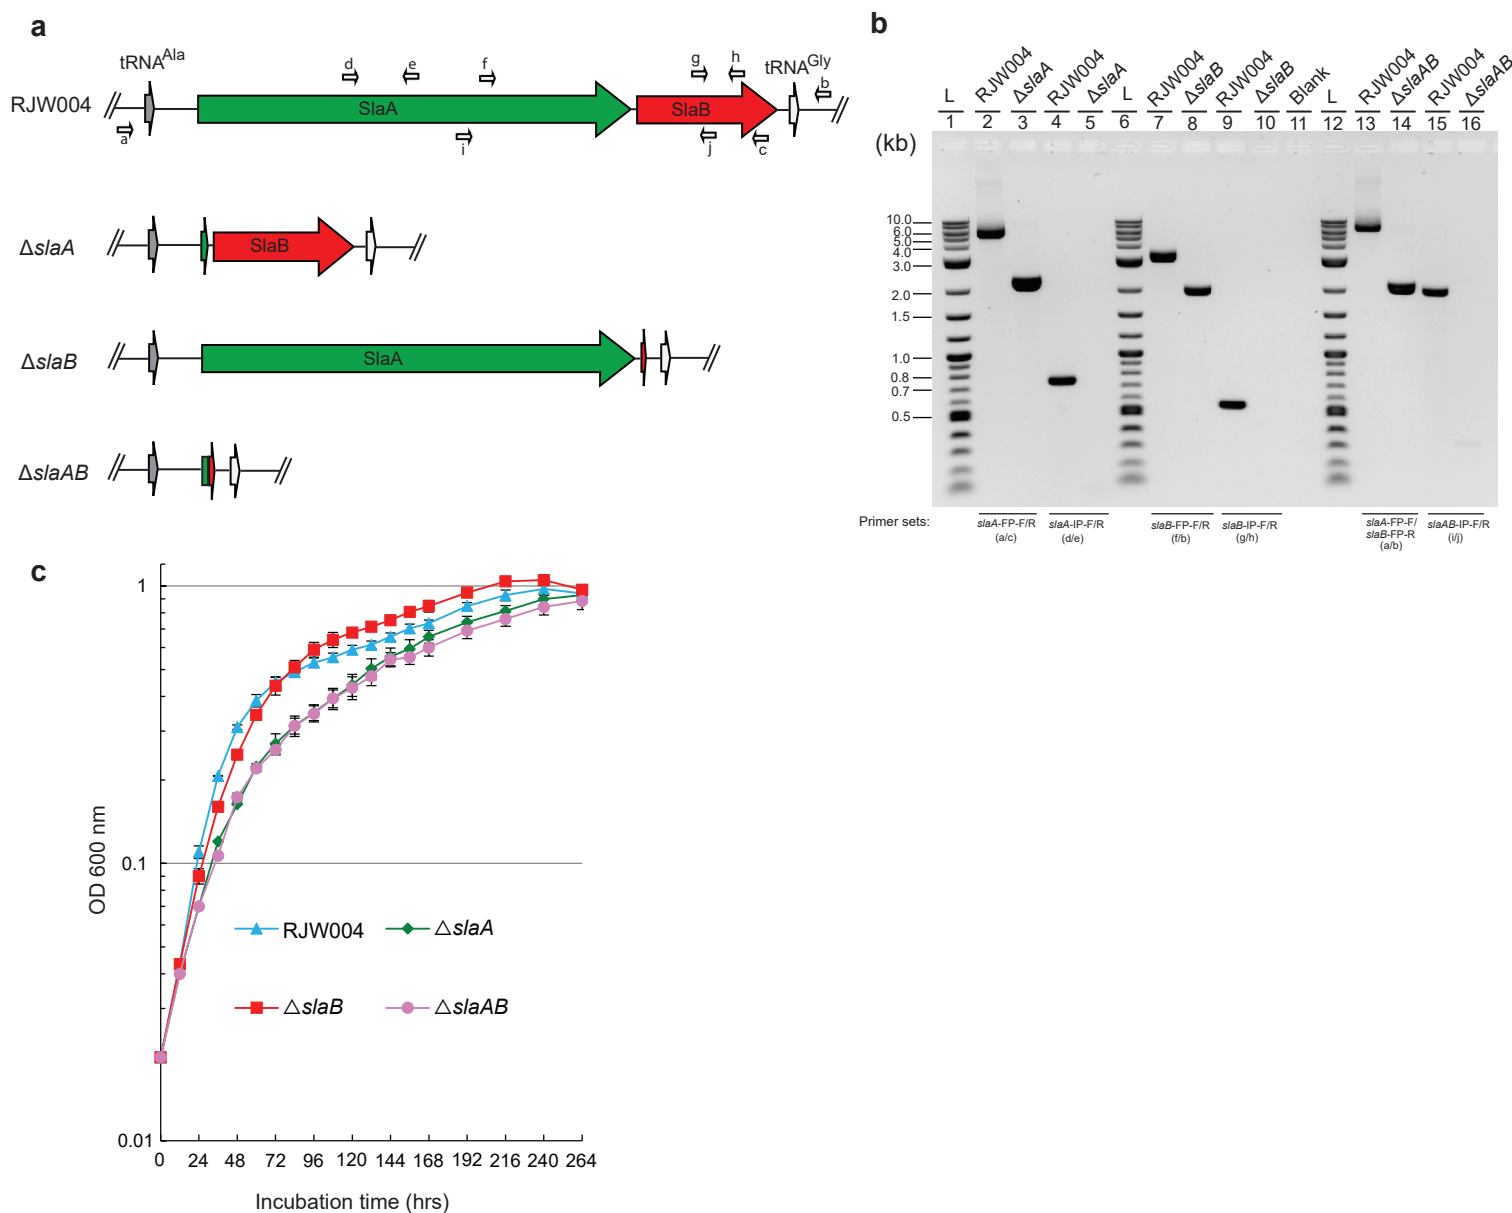

**Figure 3: S-layer genes are not essential for the *S. islandicus* cell survival.** **a**, Genomic context of S-layer genes in the genetic host and mutant strains. Relative positions of primers used to confirm S-layer gene deletions are labelled with small arrows. **b**, PCR verification of  $\Delta slaA$ ,  $\Delta slaB$ , and  $\Delta slaAB$  mutants with two primer sets, which bind the flanking and internal regions of S-layer genes, respectively. Expected sizes of amplicons can be found in Supplementary Table 8. L (lanes 1, 6, and 12) indicates the 2-Log DNA Ladder (NEB, USA). Blank (lane 11) denotes that no sample was loaded in the well. **c**, Growth profiles of R JW004 (wild type),  $\Delta slaA$ ,  $\Delta slaB$ , and  $\Delta slaAB$  mutant strains. Wild type and S-layer gene knockout strains were cultivated at pH 3.3, 76 °C for 11 days in DY liquid medium supplemented with uracil and agmatine without shaking. Cell culture growth was monitored by optical density measurements at 600 nm every 12 or 24 hrs. Error bars represented standard deviations from three independent experiments.



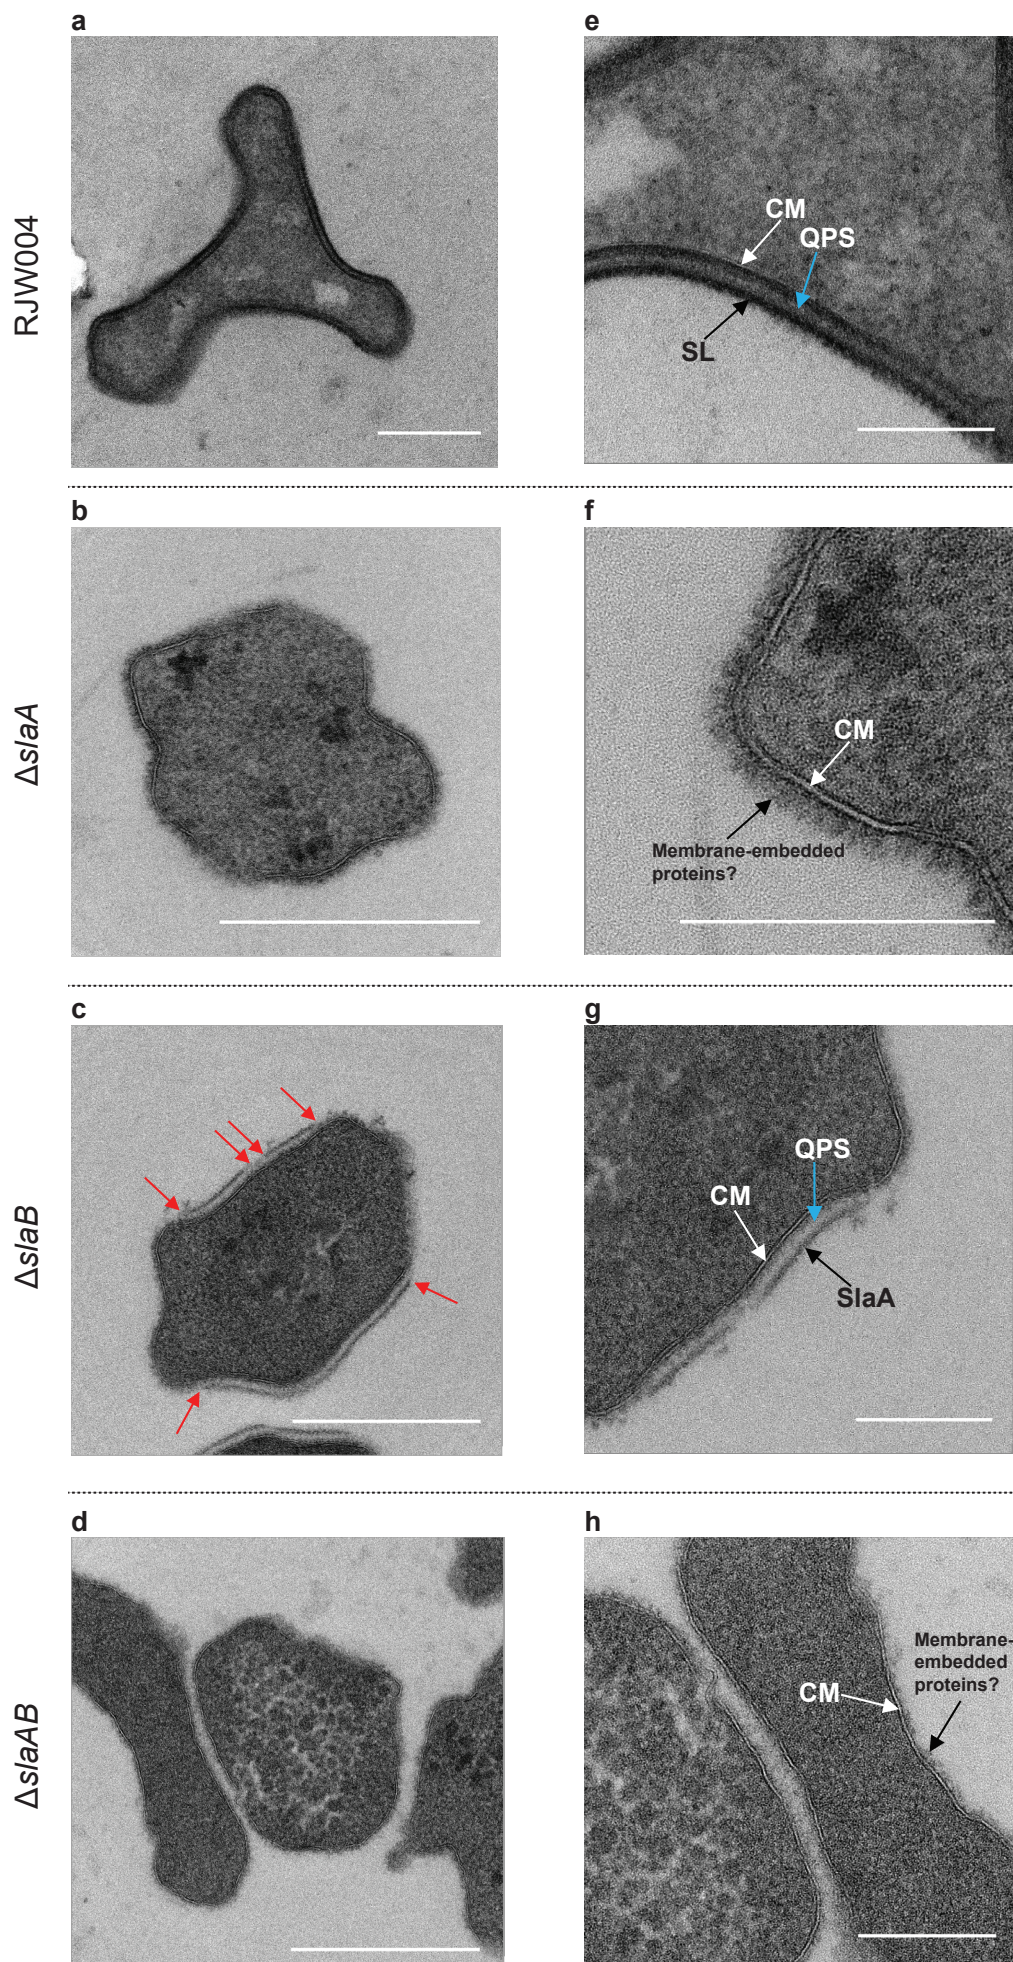

**Figure 4: Thin-section TEM analysis of the wild type and S-layer gene knockout strains.** (a-d), Representative TEM micrographs of thin-sectioned cells of the wild type,  $\Delta slaA$ ,  $\Delta slaB$ , and  $\Delta slaAB$  mutant strains, respectively. Images (e-h) are closeups of images (a-d), respectively. Red arrows indicate the breaking points of S-layer. Abbreviations: CM, cytoplasmic membrane. SL, surface layer. QPS, quasi-periplasmic space. SlaA, surface layer protein A. Scale bars, 500 nm (a-d), and 200 nm (e-h).

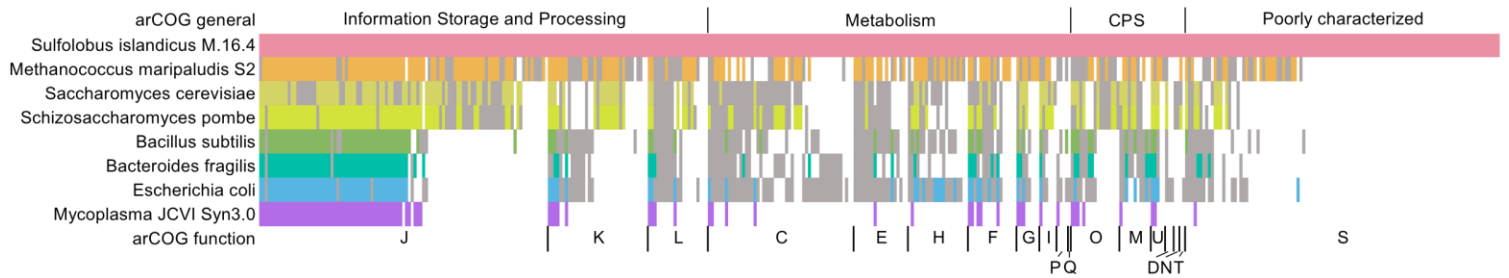

**Figure 5: Shared essential genes across the three domains of life.** Heatmap shows the presence of essential (colored) or non-essential (grey) shared NOGs compared with the *S. islandicus* essential genome. Single-letter codes for functional categories are as follows: J, translation, ribosomal structure and biogenesis; K, transcription; L, DNA replication, recombination, and repair; C, energy production and conversion; E, amino acid transport and metabolism; H, coenzyme transport and metabolism; F, nucleotide transport and metabolism; G, carbohydrate transport and metabolism; I, lipid transport and metabolism; P, inorganic ion transport and metabolism; Q, secondary metabolites biosynthesis, transport and catabolism; O, post-translational modification, protein turnover, chaperone functions; M, cell wall/membrane/envelope biogenesis; U, intracellular trafficking, secretion, and vesicular transport; D, cell cycle control and mitosis; N, cell motility; T, signal transduction; S, function unknown; CPS, cellular processes and signaling.



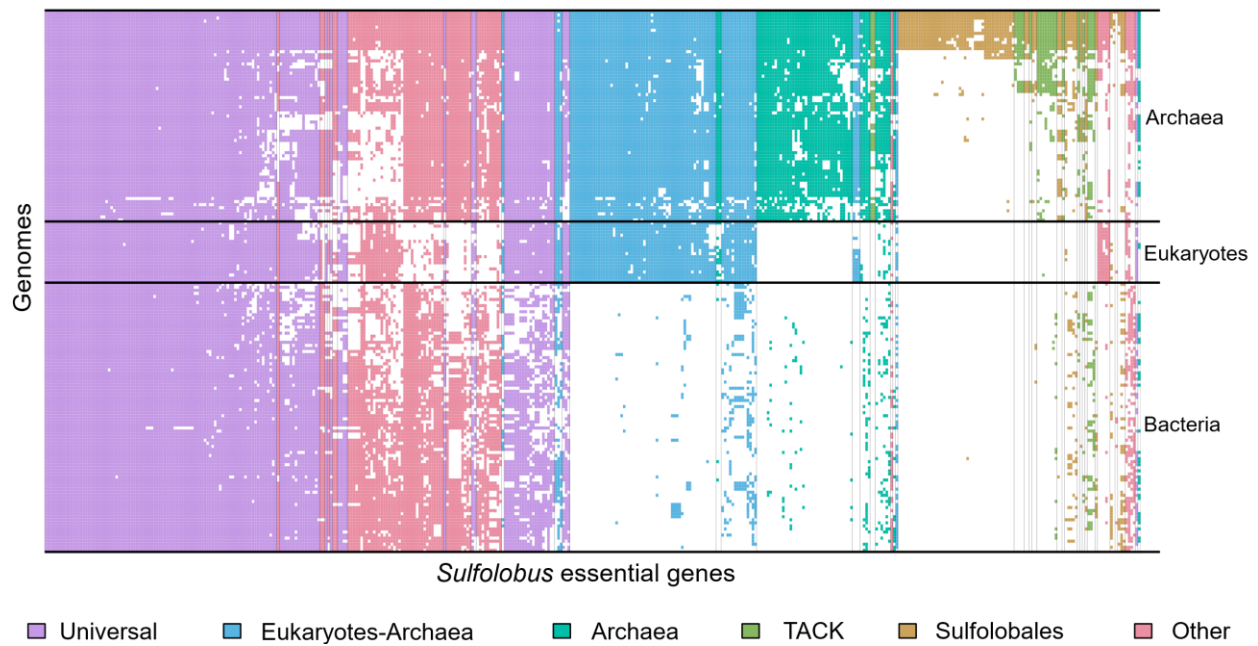

**Figure 6: Presence/absence of genes shows phyletic patterns.** Heatmap of shared NOG/arNOGs according to annotations in the eggNOG database corresponding to the essential gene set of *S. islandicus* across the three domains of life. Each row is one of 177 taxa including the set of 169 used for other distribution analyses, one from the candidate phylum *Bathyarchaeota*, and 7 Asgardarchaeota genomes (Supplemental Datasets 5 and 6). Each column is one of 441 essential genes discovered in this study. A white box indicates no matching NOG or arNOG was found, while a colored box indicates presence. Colors indicate categories defined in Table 1 and Table 2.
